# Supplementary material for: Bimetallic conjugated microporous polymer derived B,N-doped porous carbon wrapped Co3Fe7 alloy composite as a bifunctional oxygen electrocatalyst for a breathing Zn–air battery
Source: Royal Society of Chemistry journal article supplement (doi:10.1039/d1nj04063d), 2021-01-01
Supplement: d1nj04063d1.pdf [file d1nj04063d1.pdf]

# **Bimetallic Conjugated Microporous Polymer Derived B, N-doped Porous Carbon Wrapped $\text{Co}_3\text{Fe}_7$ alloy Composite as Bifunctional Oxygen Electrocatalyst for Breathing Zn-air battery**

Jinli Dou,<sup>a†</sup> Haotian Luo,<sup>a†</sup> Chunli Zhang,<sup>b†</sup> Jingjing Lu,<sup>† a</sup> Xiujuan Luan,<sup>a</sup> Wenxue Guo,<sup>a</sup> Teng Zhang,<sup>a</sup> Jingkun Bai,<sup>\*d</sup> Weiwei Bian<sup>\*a</sup>, Xueli Zhang,<sup>\*c</sup> Baolong Zhou<sup>\*a</sup>

<sup>a</sup>*School of Pharmacy, Weifang Medical University, Weifang, 261053, Shandong, P. R. China.*

<sup>b</sup>*Western Pharmacy, Anqiu Hospital of Traditional Chinese Medicine, Weifang, Shandong, P. R. China.*

<sup>c</sup>*Department of Histology and Embryology, Weifang Medical University, 261053, Shandong, China.*

<sup>d</sup>*School of Bioscience and Technology, Weifang Medical University, Weifang, 261053, PR China*

*E-mail: [zhoubaolong@wfmc.edu.cn](mailto:zhoubaolong@wfmc.edu.cn)*

†These authors make equal contribution to this article.

## **Contents**

### **Section 1. Materials and Characterization**

### **Section 2. Experimental Details**

### **Section 3. Liquid NMR**

### **Section 4. TG and TEM**

### **Section 5. XPS**

### **Section 6. Electrochemical Performance**

### **Section 7. Supporting Tables**

### **Section 8. Supporting References**

## Section 1. Materials and Characterization

### Materials

Chemicals were purchased from commercial suppliers and were used without further purification unless otherwise noted. *N,N*-Dimethylformamide (DMF) anhydrous solvent was distilled from commercial DMF with  $\text{CaH}_2$ . Pyrrole was distilled before use.

### Characterization

$^1\text{H}$  and  $^{13}\text{C}$  NMR spectra of prepared monomers were recorded on an Avance Bruker DPX 400 (400 MHz) in the solvent of  $\text{CDCl}_3$ . Solid-state  $^{13}\text{C}$  CP/MAS NMR were collected on Bruker SB Avance III 500 MHz spectrometer. Fourier Transform Infrared Spectroscopy (FTIR) was performed on KBr pellets in the range from 4000 to 400  $\text{cm}^{-1}$  using Spectrum Spotting 400. The elemental analysis was performed by Elementar Vario EL III (Elementar Analysensysteme GmbH, Germany) based on JY/T 017-1996 general rules for elemental analyzer. Thermo-gravimetric analysis (TGA) were recorded using NETZSCH STA 449C analyzer from 25 °C to 900 °C at a heating rate of 10 °C  $\text{min}^{-1}$  under the protection of  $\text{N}_2$ . The morphologies of powder samples were evaluated by field-emission scanning electron Microscopy (FESEM, Ultra 55) and transmission electron microscopy (TEM, Tecnai G2 20 TWIN) via dipping the prepared samples on a Cu-net. The adsorption and desorption measurements for  $\text{N}_2$  were performed on a Belsorp max analyzer (Japan) at low temperature of -273K. Before test, all these samples were degassed overnight under high vacuum at the temperature of 150 °C to remove the solvent or the water absorbed in the porous skeleton. X-ray Photoelectron Spectroscopy (XPS) was conducted on XPSESCALAB 250Xi analyser.

X-ray diffraction (XRD) parameters were obtained using a Rigaku-DMAX 2500 diffractometer at a rate of  $5^\circ \text{ min}^{-1}$  from  $5^\circ$  to  $80^\circ$ .

## Section 2. Experimental Details

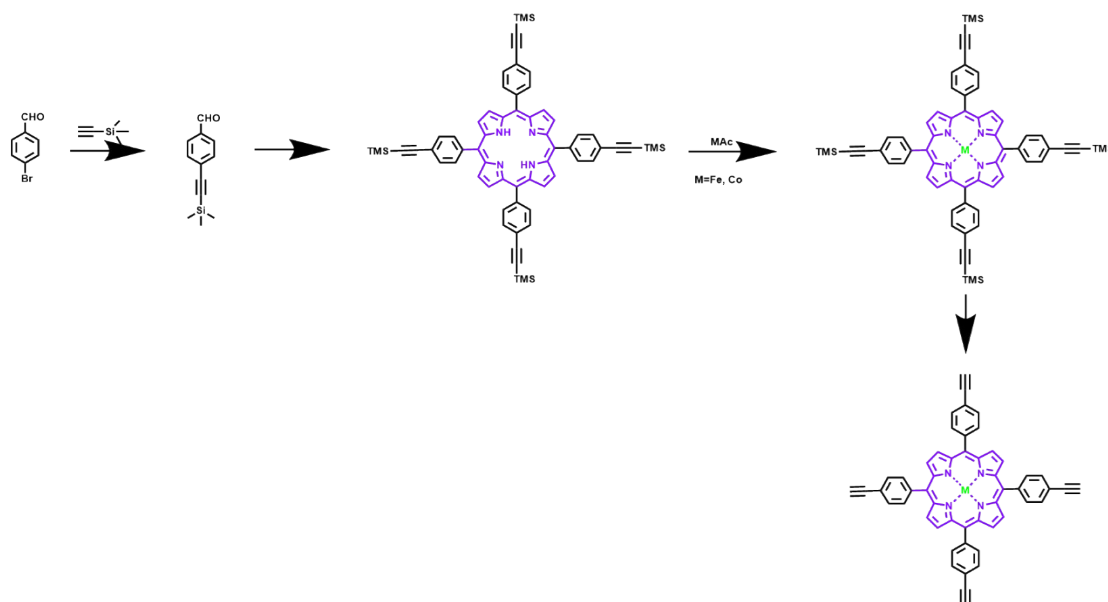

**Scheme S1.** Synthetic routes of TEPP-M.

### Synthesis of 4-(Trimethylsilyl)ethynylbenzaldehyde

A solution of 4-bromobenzaldehyde (18.5 g, 100 mmol),  $\text{PdCl}_2(\text{PPh}_3)_2$  (510 mg, 0.727 mmol), and  $\text{CuI}$  (0.228 mg, 1.20 mmol) in a mixture of 100 mL of dry THF and 28 mL of triethylamine was prepared in a 250 mL round-bottom flask degassed and stirred under  $\text{N}_2$  for 5 min at room temperature. Trimethylsilylacetylene (14.7 g, 150 mmol) was added, the reaction was stirred at  $65^\circ \text{C}$  overnight. The crude mixture was dissolved in 100 mL dichloromethane and washed with  $1 \times 100 \text{ mL H}_2\text{O}$ ,  $1 \times 100 \text{ mL}$  of 10% HCl solution,  $1 \times 100 \text{ mL}$  of  $\text{H}_2\text{O}$ . The organic phase was dried over  $\text{Na}_2\text{SO}_4$  and filtered, and the solvent was removed. The crude mixture was purified by column chromatography (hexanes/dichloromethane 2:1) providing a colorless solid. (19.0 g, 95%).

### Synthesis of 5,10,15,20-Tetrakis(4-[(trimethylsilyl)ethynyl]-phenyl)porphyrin.

A solution of 4-[(trimethylsilyl)ethynyl]-benzaldehyde (17.5 g, 86.5 mmol) in propionic acid (ca. 360 mL) was brought to reflux temperature. Then, Pyrrole (6 mL, 86.4 mmol) was added. The mixture was stirred at reflux for 3 h, after which it was allowed to cool to room temperature. A black solid precipitated and the suspension was allowed to stand overnight. The black liquid was removed by filtration and the remaining black solid was washed with methanol until the filtrate was colorless (Yield: 5.9 g, 27.3%).

$^1\text{H}$  NMR ( $\text{CDCl}_3$ , ppm): -2.84 (NH, s, 2H), 0.372 (Si- $\text{CH}_3$ , s, 36H), 7.86 (m-ArH, d, 3J = 7.80 Hz, 8H); 8.14 (o-ArH, d, 3J = 7.80 Hz, 8H); 8.81 (b-H, s, 8H).

#### **Synthesis of 5,10,15,20-Tetrakis(4-(ethynylphenyl)-porphyrin.**

5,10,15,20-Tetrakis(4-(trimethylsilyl)ethynyl-phenyl)porphyrin (3 g, 3 mmol) was dissolved in 200 mL of THF. Then, 15 mL of TBAF was dropped in the solution at  $-78\text{ }^\circ\text{C}$ . The temperature was raised from  $-78\text{ }^\circ\text{C}$  to room temperature slowly and kept overnight. 200 mL  $\text{H}_2\text{O}$  was added and extract with  $3 \times 200\text{ mL}$  of  $\text{CHCl}_3$ . The organic phase was collected and dried with anhydrous  $\text{Na}_2\text{SO}_4$  and evaporated to dry to get the product as light yellow solid (Yield: 2.1 g, 98.5%).  $^1\text{H}$ -NMR ( $\text{CDCl}_3$ , ppm): -2.83 (NH, s, 2H), 3.33 (CCH, s, 4H), 7.90 (m-ArH, d, 3J = 8.40 Hz, 8H); 8.17 (o-ArH, d, 3J = 8.40 Hz, 8H); 8.84 (b-H, s, 8H).

#### **Synthesis of 5,10,15,20-Tetrakis(4-(ethynylphenyl)-porphyrin-cobalt.**

5,10,15,20-Tetrakis(4-(ethynyl-phenyl)-porphyrin (0.937 g, 1.32 mmol) was dissolved in 70 mL of DMF.  $\text{Co}(\text{OAc})_2 \cdot 4\text{H}_2\text{O}$  (0.328 g, 1.32 mmol) was added into the reaction system. The solution was heated to reflux for 1 h and then cooled to room temperature. Then, 100 mL MeOH was added and a purple precipitate was collected. After recrystallizing with  $\text{CHCl}_3$  and MeOH, a purple solid product was collected (Yield: 24%).

### Synthesis of 5,10,15,20-Tetrakis(4-(ethynylphenyl)-porphyrin-iron.

The route for the synthesis of 5,10,15,20-Tetrakis(4-(ethynylphenyl)-porphyrin]iron was as the same as the procedure of [5,10,15,20-tetrakis(4-(ethynylphenyl)porphyrin]cobalt. 5,10,15,20-Tetrakis(4-(ethynyl-phenyl)porphyrin (0.937 g, 1.32 mmol) was dissolved in 70 mL of DMF and Fe(OAc)<sub>2</sub>(0.229 g, 1.32 mmol) was added. Yield:20.7%.

### Synthesis of sample 2

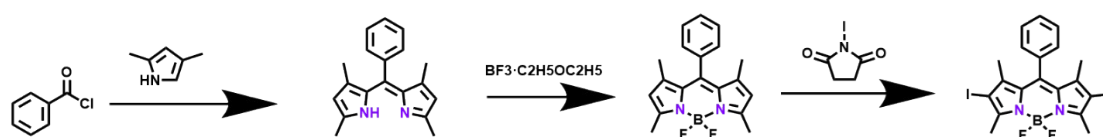

**Scheme S2.** Synthetic routes of Boidpy-2I.

### 2,6-Diiodo-1,3,5,7-tetramethyl-8-phenyl-4,4-difluoroboradiazaindacene

Under an argon atmosphere, benzoyl chloride (2.8 g, 0.021 mol) and 2,4-dimethylpyrrole (4 mL, 3.7 g, 0.04 mol) were added to dry dichloromethane (150 mL) using a syringe. The mixture was stirred at room temperature overnight, then Et<sub>3</sub>N (20 mL) and BF<sub>3</sub>·Et<sub>2</sub>O (20 mL) were added under ice-cold conditions, and the reaction mixture was stirred for 1 h. Then, the mixture was poured into water (200 mL), and the organic layer was collected, dried over anhydrous Na<sub>2</sub>SO<sub>4</sub>, and evaporated under reduced pressure. The crude product was purified by column chromatography on silica gel (dichloromethane/n-hexane=1:1, v/v) to give compound 1,3,5,7-tetramethyl-8-phenyl-4,4-difluoroboradiazaindacene as a red powder (yield: ~20%). To a solution of compound 1,3,5,7-tetramethyl-8-phenyl-4,4-difluoroboradiazaindacene (200 mg, 0.62 mmol) in dry dichloromethane (25 mL) was added excess N-iodosuccinimide (NIS; 558 mg, 2.48 mmol). The mixture was stirred at room temperature for about 30 min (monitored by TLC until the starting material had been

completely consumed). The reaction mixture was then concentrated under vacuum, and the crude product was purified by column chromatography on silica gel (n-hexane/dichloromethane=2:1, v/v). The red band was collected and the solvent was removed under reduced pressure to obtain a red solid (yield: ~70%).

### Synthesis of BP-CMP

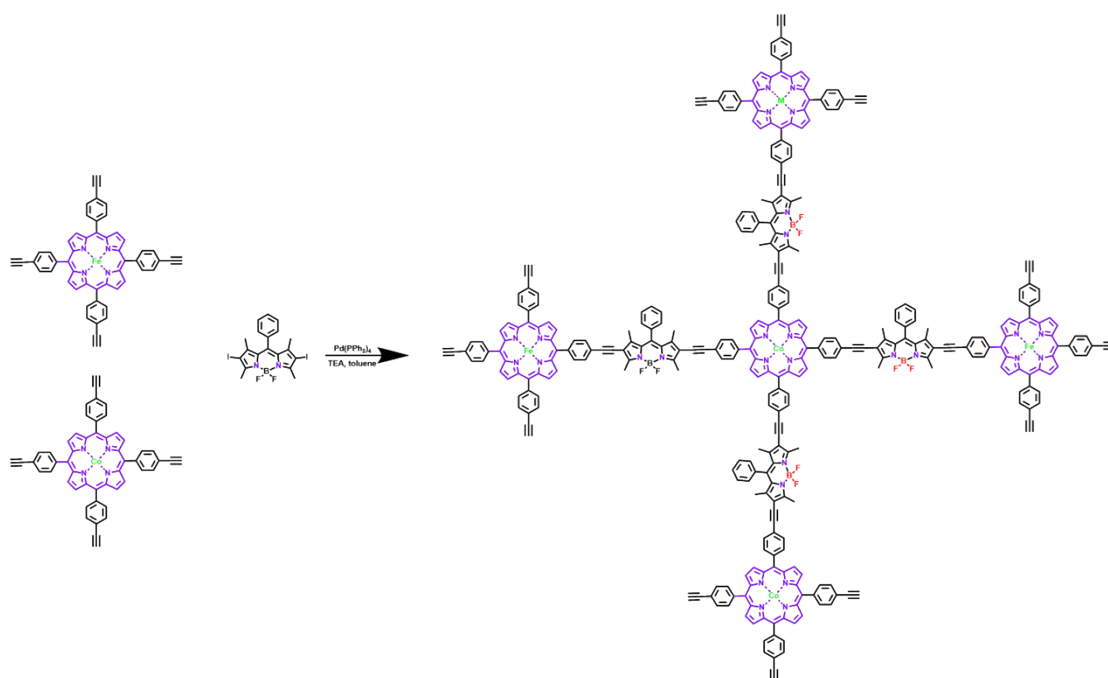

TEPP-Fe (64.0 mg, 0.085 mmol), TEPP-Co (65.0 mg, 0.085 mmol) and BODIPY-2I (230 mg, 0.34 mmol) were dissolved in anhydrous solvent (DMF: TEA=1:1, 8.0 mL). After the mixture was degassed by three freeze-pump-thaw cycles to exclude the oxygen, Pd(PPh<sub>3</sub>)<sub>4</sub> (25 mg, 0.016 mmol) and CuI (7.0 mg, 0.04 mmol) were added to the system under N<sub>2</sub> protection. The reaction took place in a degassed Pyrex tube (10 mL) through at least three freeze-pump-thaw cycles and followed by sealing off and heating at 150 °C for 72 h. Once the reaction is complete, the precipitate was thoroughly washed with THF, chloroform, and acetone.

### Synthesis of P-CMP

As a similar procedure of the preparation of BP-CMP, P-CMP was obtained by TEPP-Fe (64 mg,

0.085 mmol), TEPP-Co (65 mg, 0.085 mmol) and 1,4-dibromobenzene (0.708 g, 3.0 mmol) with a yield of 70%.

### **Electrochemical Measurements**

All electrochemical tests were performed at room temperature using standard three-chamber cells to record the electrode pairs of platinum grid, and the Ag/AgCl electrode saturated with KCl or saturated calomel electrode (SCE) was applied as the reference electrode. All the potentials were referenced to the reversible hydrogen electrode (RHE) scale according to the Nernst equation:

$$E_{\text{(RHE)}} = E_{\text{(Ag/AgCl)}} + 0.059 \times \text{pH} + 0.197 \text{ V, at } 25^{\circ}\text{C}$$

$$E_{\text{(RHE)}} = E_{\text{(Hg/HgCl)}} + 0.059 \times \text{pH} + 0.098 \text{ V, at } 25^{\circ}\text{C}.$$

The working electrode can be either a rotating disk electrode (RDE) composed of a glass carbon disk (diameter 5.0mm) or a rotating ring disk electrode (RRDE) composed of a glass carbon disk (diameter 3 mm) surrounding an outer platinum ring (inner diameter 5 mm, outer diameter 7 mm). The catalyst ink is loaded on the working electrode surface. The catalyst inks and commercially available Pt/C (20 wt%) inks are made by dispersing 5.0 mg of the fresh-prepared catalyst or commercially available Pt/C (20 wt%) in an ultrasonic bath to a 500  $\mu\text{L}$  solvent mixture (25  $\mu\text{L}$  Naffion solution (5 wt%), 75  $\mu\text{L}$   $\text{H}_2\text{O}$ , and 400  $\mu\text{L}$  ethanol) to a uniform suspension. Then suck the catalyst ink (8  $\mu\text{L}$ ) through a straw onto the glass carbon surface of RDE or RRDE and let it dry in the air at room temperature.

The catalytic activity of the catalyst was measured by cyclic voltammetry (CV) and rotary disk electrode (RDE) at CHI-760 electrochemical station. All tests were carried out under alkaline (0.1 M KOH), neutral (0.1 M PBS), or acidic conditions (0.1 m  $\text{HClO}_4$ ). CV was

measured at 50 mV s<sup>-1</sup> in various electrolytes saturated with O<sub>2</sub> or Ar. The RDE/RRDE tests were examined with a scanning rate of 5 mV s<sup>-1</sup> at different speeds ranging from 400 to 2500 rpm. The K-L equation was applied to investigate the ORR kinetic parameters. The K-L equation can be described as follows:

$$\frac{1}{J} = \frac{1}{J_L} + \frac{1}{J_K} = \frac{1}{B \omega^{1/2}} + \frac{1}{J_K} \quad (1)$$

Where  $J$  is the current density,  $J_L$  is the current that was measured;  $J_K$  represents the kinetic-limiting current and  $\omega$  is the rotation speeds of electrode.

$$B = 0.62nFC_0(D_0)^{2/3}V^{-1/6} \quad (2)$$

In equation 2,  $n$  is the total number of transferred electrons during the oxygen reduction process;  $F$  is Faradaic constant ( $F = 96485 \text{ C mol}^{-1}$ ),  $C_0$  is the O<sub>2</sub> concentration (solubility) in 0.1 M KOH electrolyte ( $1.2 \times 10^{-6} \text{ mol cm}^{-3}$ );  $D_0$  is the O<sub>2</sub> diffusion coefficient ( $1.90 \times 10^{-5} \text{ cm}^2 \text{ s}^{-1}$ ), and  $V$  is the kinematic viscosity of the O<sub>2</sub> saturated 0.1 M KOH solution ( $0.01 \text{ cm}^2 \text{ s}^{-1}$ ). For the RRDE measurements, the disk electrode was also scanned with a rate of 5 mV s<sup>-1</sup> at a constant ring potential of 1.5 V vs. RHE. The peroxide percentage (H<sub>2</sub>O<sub>2</sub> yields) and the transferred number of electron ( $n$ ) were calculated according to the following equations (3) - (4):<sup>S3</sup>

$$H_2O_2\% = 200 \frac{I_r/N}{I_d + I_r/N} \quad (3)$$

$$N = 4 \frac{I_d}{I_d + I_r/N} \quad (4)$$

In equation 3 and 4,  $I_d$  is the disk current, and  $I_r$  refers to the ring current and  $N$  represents the current collection efficiency of the Pt ring ( $N=0.4581$ ).

### **Fabrication of Zn-Air Battery**



Typically, Zinc-Air battery was assembled by employing zinc plate as anode, electrocatalyst containing gas diffusion layer as air electrode, aqueous solution containing 6 M KOH and 0.2M Zn(OAc)<sub>2</sub> as electrolyte. For the fabrication of air electrode, the isopropanol ink containing electrocatalysts, ethanol and nafion was homogenously sprayed onto a carbon paper with a catalyst loading of 1 mg cm<sup>-2</sup>. For comparison, the commercial Pt/C or the mixture of commercial Pt/C-IrO<sub>2</sub> (in a mass ratio of 1:1) was also employed to fabricate ZABs as benchmarks.

### Section 3. Liquid NMR

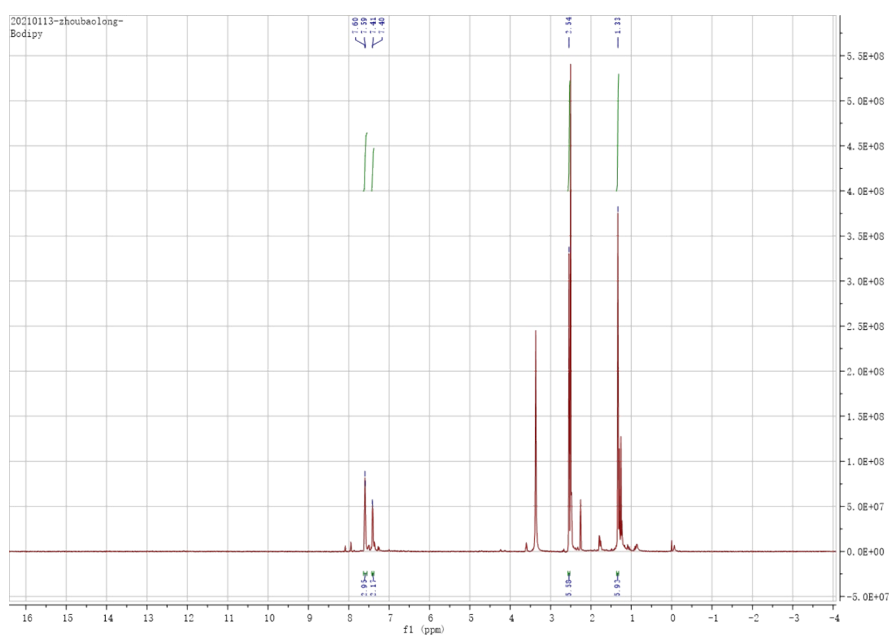

**Figure S1.** <sup>1</sup>H- NMR spectrum of Bodipy-2I

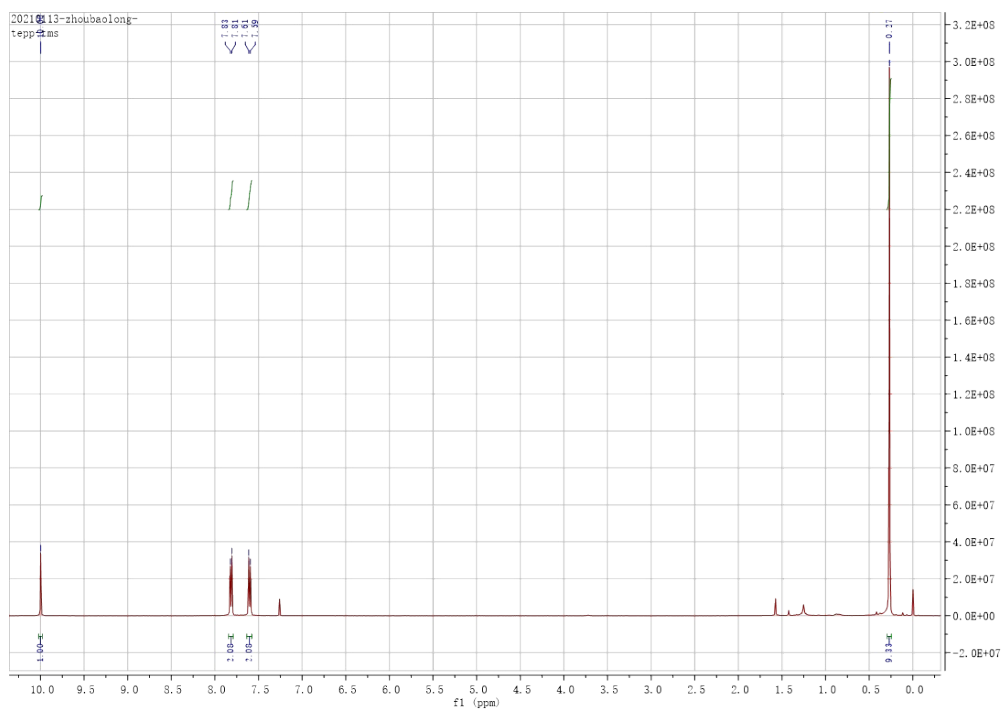

**Figure S2.**  $^1\text{H}$ -NMR spectrum of [4-(Trimethylsilyl)ethynyl]benzaldehyde.

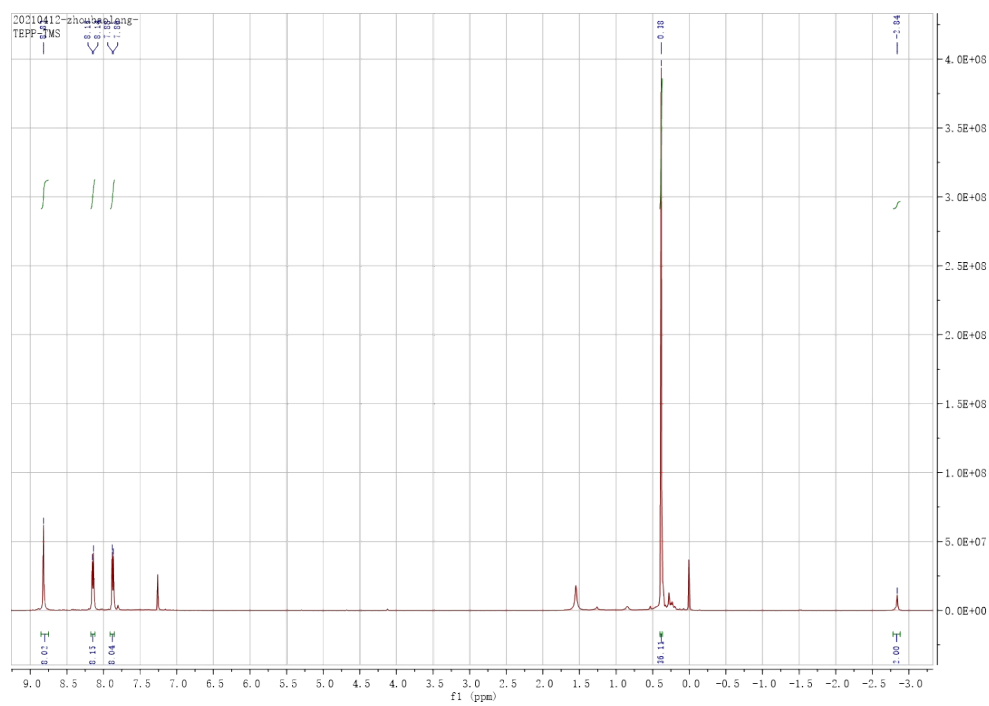

**Figure S3.**  $^1\text{H}$ -NMR spectrum of 5,10,15,20-Tetrakis(4-[(trimethylsilyl)ethynyl])phenylporphyrin

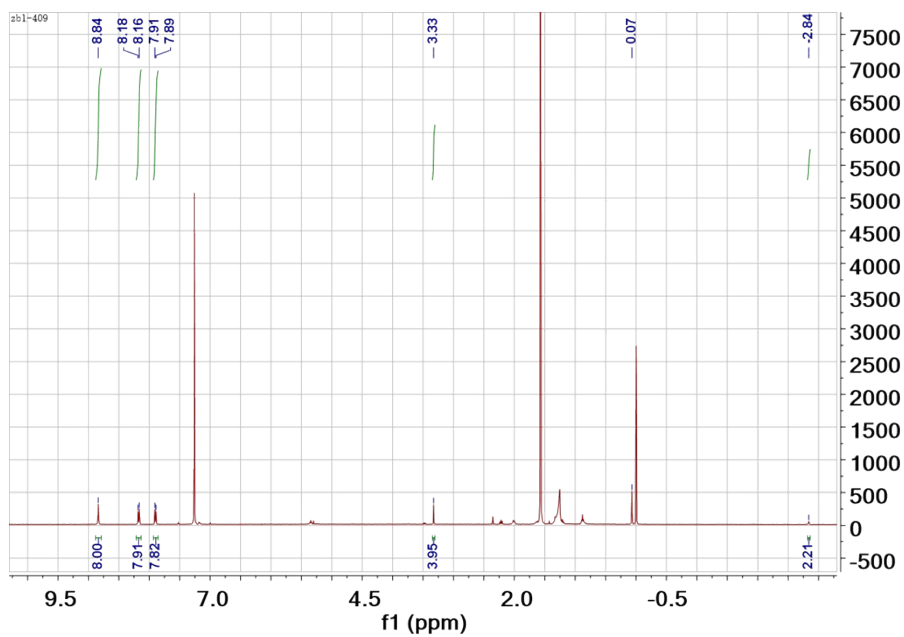

**Figure S4.** <sup>1</sup>H-NMR spectrum of 5,10,15,20-Tetrakis(4-(ethynylphenyl)-porphyrin

#### Section 4. TG and TEM

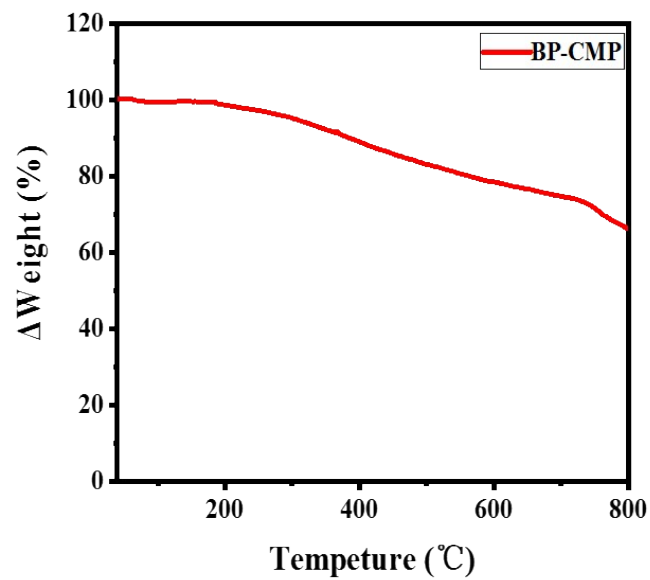

**Figure S5.** TG curves of BP-CMP.

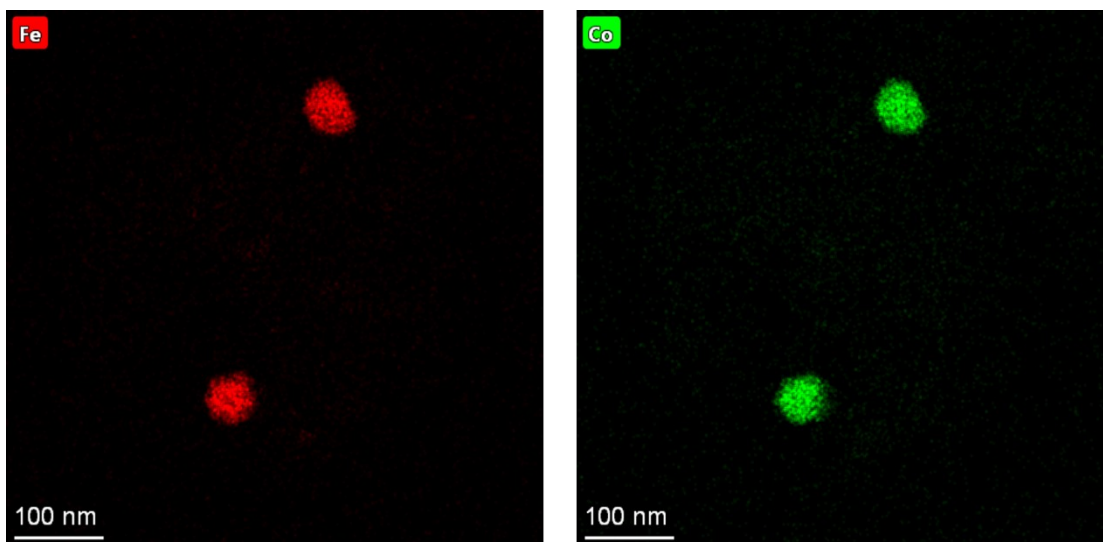

**Figure S6.** Elemental mapping images BP-800 at a scale bar of 100 nm.

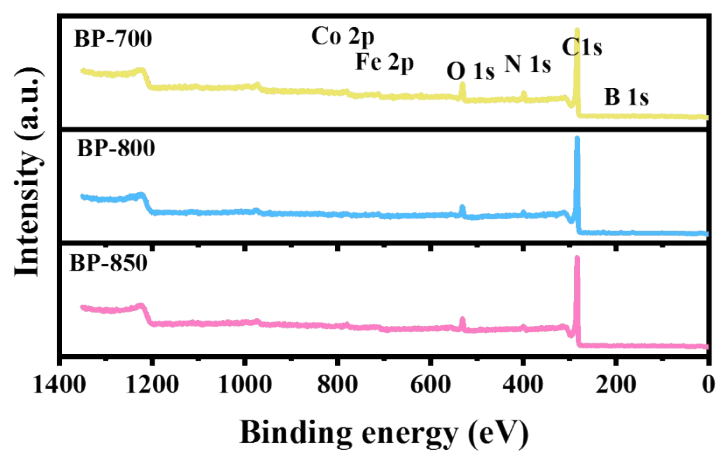

**Figure S7.** XPS survey of BP-700, BP-800 and BP-850 catalysts.

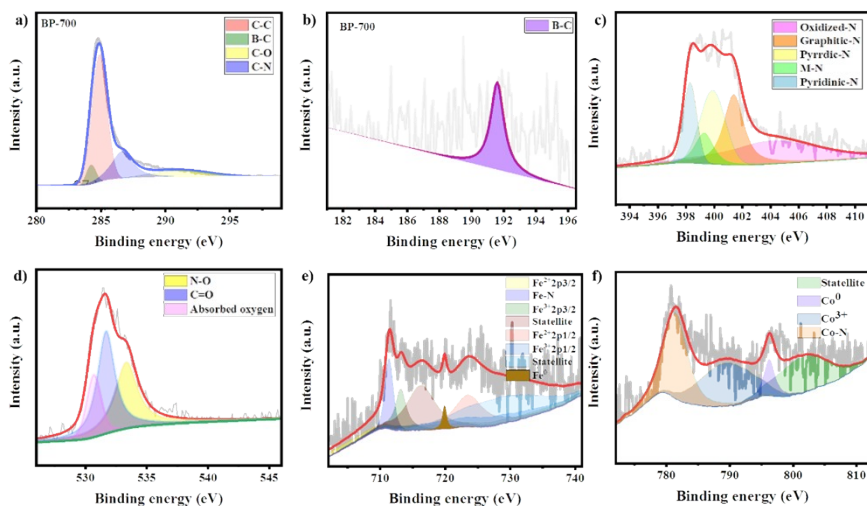

**Figure S8.** XPS of BP-700. a) High-resolution XPS of C 1s spectra for BP-700; b) High-resolution XPS of B 1s for BP-700; c) High-resolution XPS spectra of N 1s spectra for BP-700; d) High-resolution XPS spectra of O 1s spectra for BP-700; e) High-resolution XPS spectra of Fe 2p spectra for BP-700; f) High-resolution XPS spectra of Co 2p spectra for BP-700.

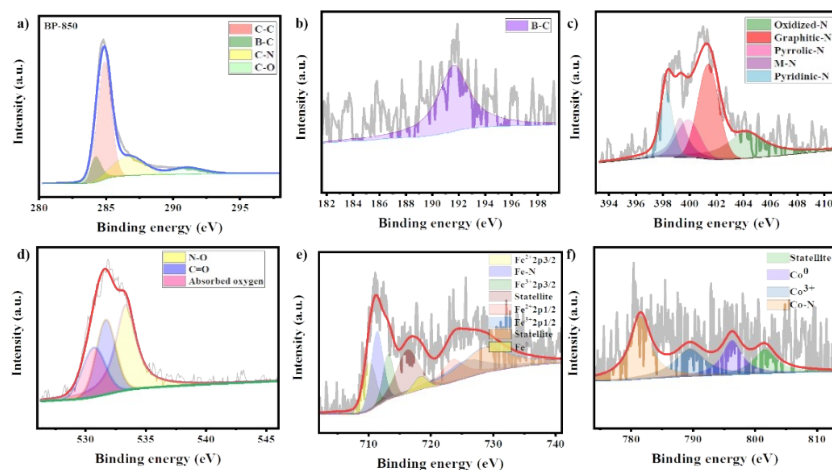

**Figure S9.** XPS of BP-850. a) High-resolution XPS of C 1s spectra for BP-850; b) High-resolution XPS of C 1s for BP-850; c) High-resolution XPS spectra of N 1s spectra for BP-850; d) High-resolution XPS spectra of O 1s spectra for BP-850; e) High-resolution XPS spectra of Fe 2p spectra for BP-850; f) High-resolution XPS spectra of Co 2p spectra for BP-850.

## Section 7. Electrochemical Performance

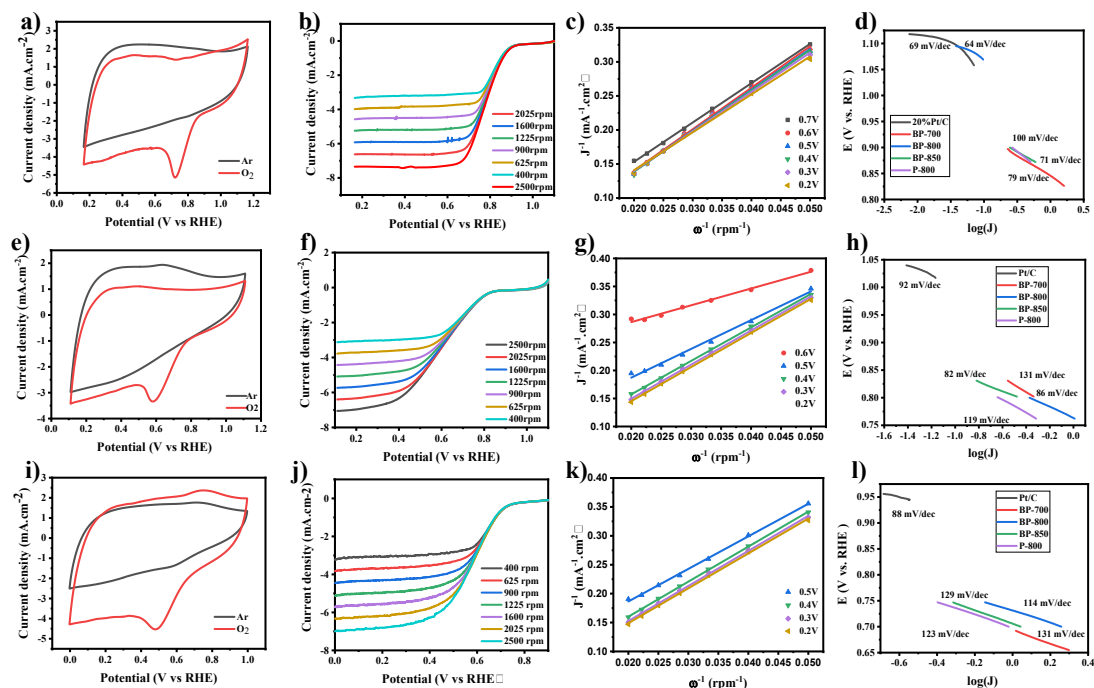

**Figure S10.** Electrochemical performance of BP-800 in various electrolytes from alkaline conditions to acidic conditions. a) Cyclic voltammograms (CV) of BP-800 obtained in O<sub>2</sub> and Ar saturated in 0.1 M KOH; b) LSV curves of BP-700 at different rotation rates in 0.1 M KOH; c) K-L plot and the corresponding electron transfer numbers for BP-700 in 0.1 M KOH; d) The Tafel slopes of ORR on BP-700, BP-800, BP-850, P-800 and Pt/C in a) 0.1 M KOH; e) Cyclic voltammograms (CV) of BP-700 obtained in O<sub>2</sub> and Ar saturated in 0.1 M PBS; f) LSV curves of BP-700 at different rotation rates in 0.1 M PBS; g) K-L plot and the corresponding electron transfer numbers for BP-700 in 0.1 M PBS; h) The Tafel slopes of ORR on BP-700, BP-800, BP-850, P-800 and Pt/C in a) 0.1 M PBS; i) Cyclic voltammograms (CV) obtained in O<sub>2</sub> and Ar saturated in 0.1 M HClO<sub>4</sub>; j) LSV curves of BP-700 at different rotation rates in 0.1 M HClO<sub>4</sub>; k) K-L plot and the corresponding electron transfer numbers for BP-700 in 0.1 M HClO<sub>4</sub>; l) The Tafel slopes of ORR on BP-700, BP-800, BP-850, P-800 and Pt/C in a) 0.1 M HClO<sub>4</sub>

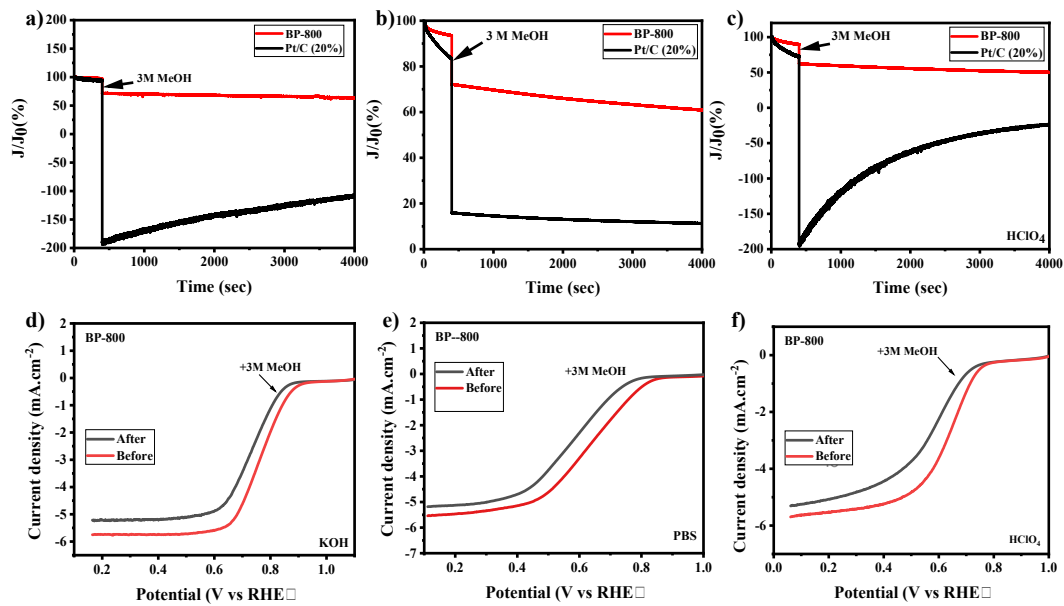

**Figure S11.** Comparison of methanol immunity of BP-800 and commercial Pt/C. a) Comparison of methanol tolerance test between BP-800 and Pt/C (20%) in a) 0.1M KOH, b) 0.1M PBS and c) 0.1M HClO<sub>4</sub> saturated O<sub>2</sub>; b) LSV curve of BP-800 measured before and after the injection of 3 M methanol in a) 0.1M KOH, b) 0.1M PBS and c) 0.1M HClO<sub>4</sub> saturated O<sub>2</sub>.

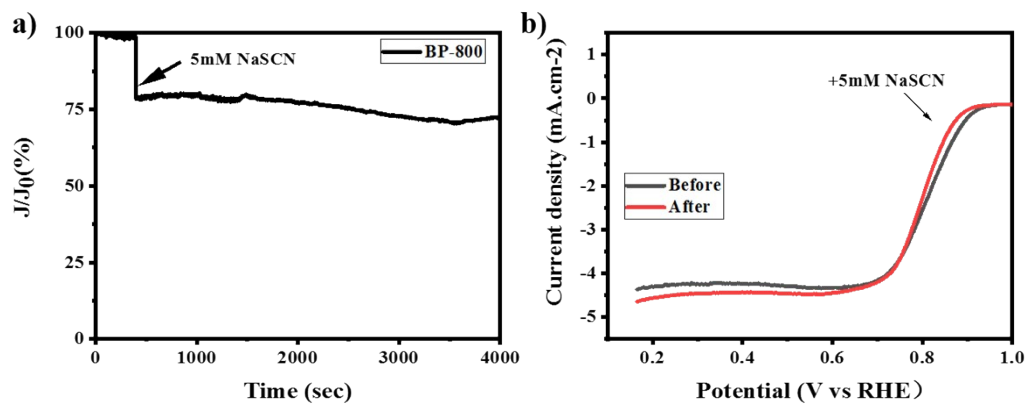

**Figure S12.** a) Current-time (i-t) curves and (b) RDE results of BP-800 in O<sub>2</sub>-saturated 0.1 M KOH solution (without and with SCN<sup>-</sup>)

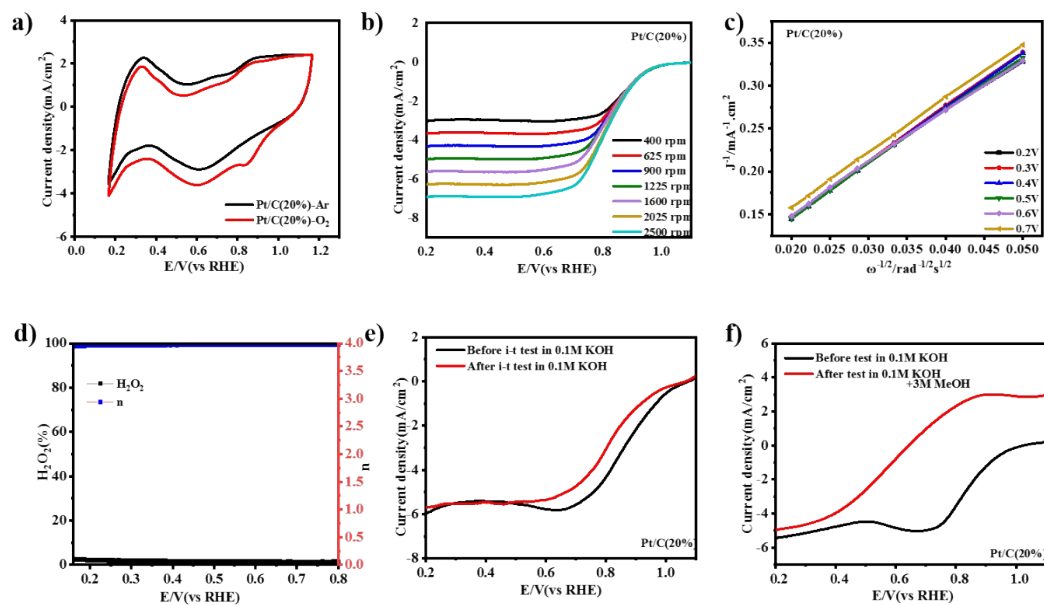

**Figure S13.** a) CV curves of commercial Pt/C (20%) on a glassy carbon electrodes in 0.1 M KOH saturated with O<sub>2</sub> or Ar at a sweep rate of 50 mV s<sup>-1</sup>; b) LSV of commercial Pt/C (20%) at various rotation speeds; c) K-L plots curves of commercial Pt/C (20%); d) Percentage of hydrogen peroxide yield and the electron transfer number (n) of Pt/C at different potentials; e) Polarization curves of Pt/C (20%) measured by RDE in O<sub>2</sub>-saturated 0.1 M KOH before (black line) and after (red line) the i-t (20000 s) experiments; f) LSV curve of Pt/C measured before and after the injection of 3 M methanol.



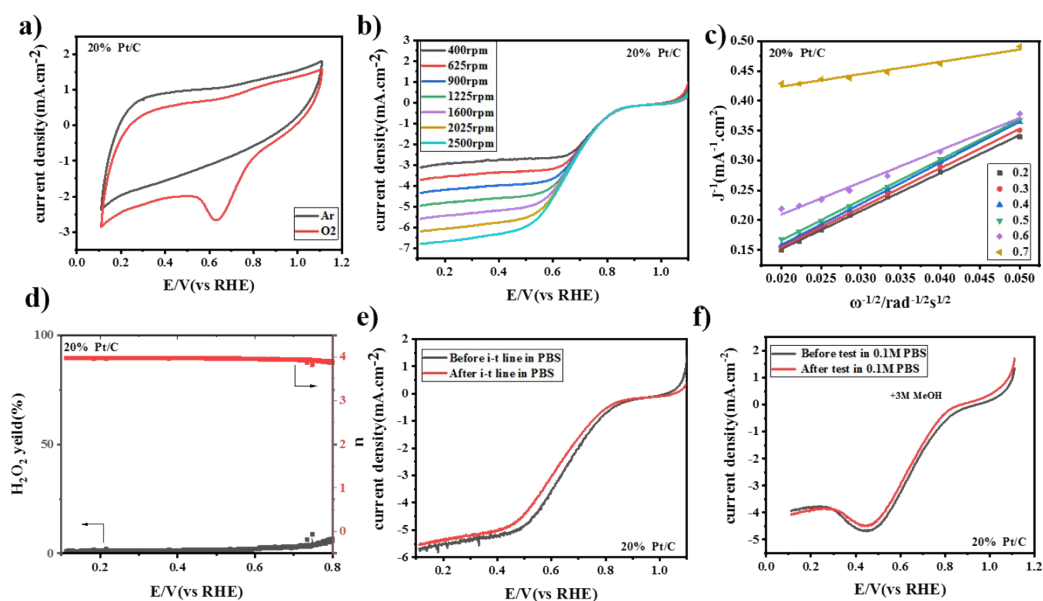

**Figure S14.** Electrochemical performance of commercial Pt/C in neutral conditions. a) CV curves of commercial Pt/C (20%) on glassy carbon electrodes in water solution of 0.1 M PBS saturated with O<sub>2</sub> or argon at a sweep rate of 50 mV s<sup>-1</sup>. b) LSV of commercial Pt/C (20%) at different rotation speeds; c) K-L plots curves of Pt/C (20%) at different potentials; d) Percentage of hydrogen peroxide yield and the electron transfer number (n) of Pt/C (20%) at different potentials; e) Polarization curves of Pt/C (20%) measured by RDE in O<sub>2</sub>-saturated 0.1 M PBS before (black line) and after (red line) the i-t (20000 s) experiments; f) LSV curve of Pt/C (20%) measured before and after the injection of 3 M methanol.

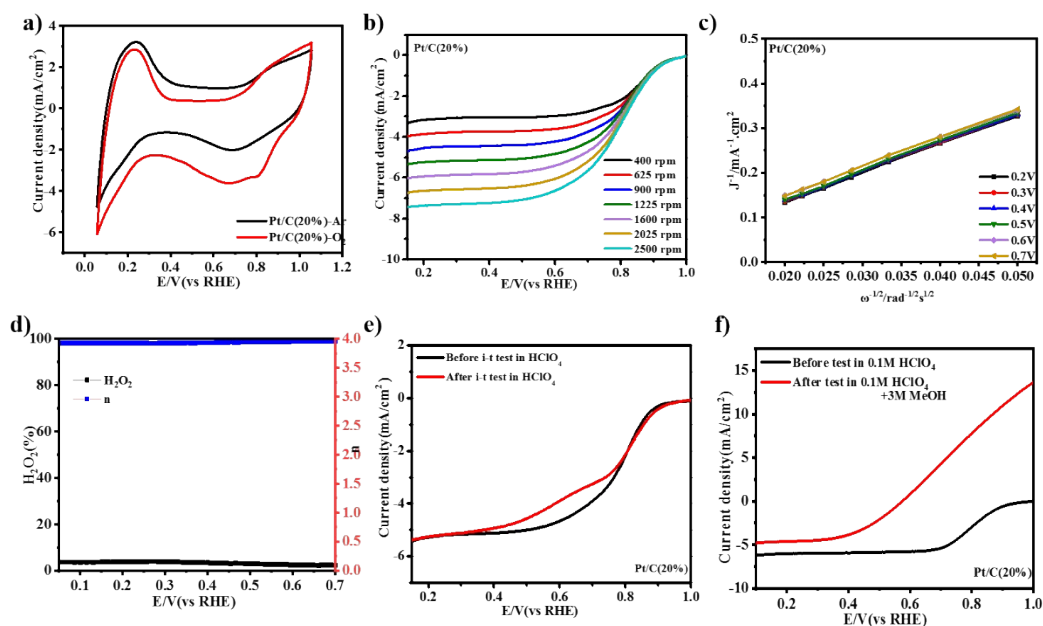

**Figure S15.** Electrochemical performance of commercial Pt/C in acidic conditions. a) CV curves of commercial Pt/C (20%) on glassy carbon electrodes in water solution of 0.1 M HClO<sub>4</sub> saturated with O<sub>2</sub> or argon at a sweep rate of 50 mV s<sup>-1</sup>. b) LSV of commercial Pt/C (20%) at different rotation speeds; c) K-L plots curves of Pt/C (20%) at different potentials; d) Percentage of hydrogen peroxide yield and the electron transfer number (n) of Pt/C (20%) at different potentials; e) Polarization curves of Pt/C (20%) measured by RDE in O<sub>2</sub>-saturated 0.1 M HClO<sub>4</sub> before (before line) and after (red line) the i-t (20000 s) experiments; f) LSV curve of Pt/C (20%) measured before and after the injection of 3 M methanol.

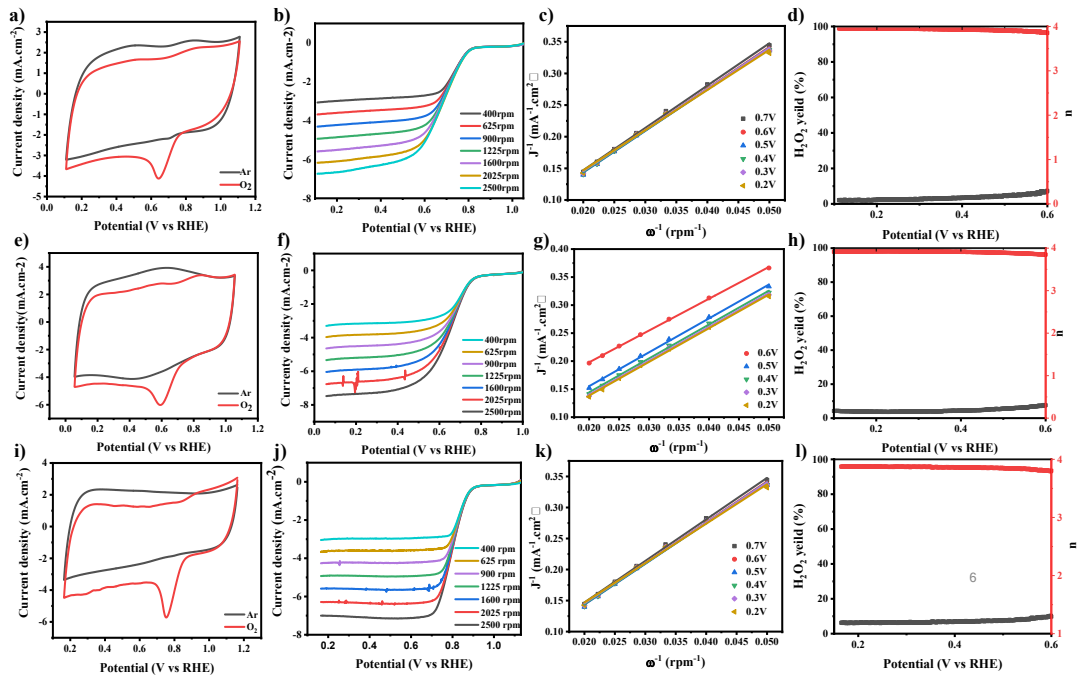

**Figure S16.** Electrochemical performance of BP-700 in various electrolytes from alkaline conditions to acidic conditions. a) Cyclic voltammograms (CV) of BP-700 obtained in O<sub>2</sub> and Ar saturated in 0.1 M KOH; b) LSV curves of BP-700 at different rotation rates in 0.1 M KOH ; c) K-L plot and the corresponding electron transfer numbers for BP-700 in 0.1 M KOH; d) Percentage of hydrogen peroxide yield and the electron transfer number (n) of BP-700 at different potentials in 0.1 M KOH; e) Cyclic voltammograms (CV) of BP-700 obtained in O<sub>2</sub> and Ar saturated in 0.1 M PBS; f) LSV curves of BP-700 at different rotation rates in 0.1 M PBS; g) K-L plot and the corresponding electron transfer numbers for BP-700 in 0.1 M PBS; h) Percentage of hydrogen peroxide yield and the electron transfer number (n) of BP-700 at different potentials in 0.1 M PBS; i) Cyclic voltammograms (CV) obtained in O<sub>2</sub> and Ar saturated in 0.1 M HClO<sub>4</sub>; j) LSV curves of BP-700 at different rotation rates in 0.1 M HClO<sub>4</sub>; k) K-L plot and the corresponding electron transfer numbers for BP-700 in 0.1 M HClO<sub>4</sub>; l) Percentage of hydrogen peroxide yield and the electron transfer number (n) of BP-700 at different potentials in 0.1 M HClO<sub>4</sub> electrolytes.

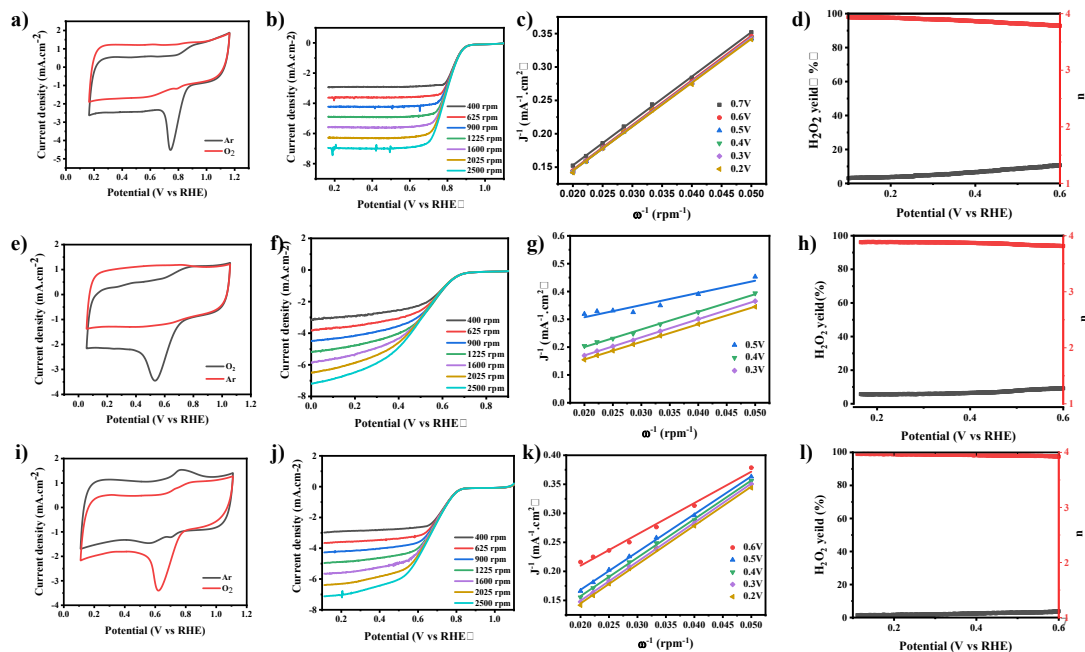

**Figure S17.** Electrochemical performance of BP-850 in various electrolytes from alkaline conditions to acidic conditions. a) Cyclic voltammograms (CV) of BP-850 obtained in O<sub>2</sub> and Ar saturated in 0.1 M KOH; b) LSV curves of BP-850 at different rotation rates in 0.1 M KOH; c) K-L plot and the corresponding electron transfer numbers for BP-850 in 0.1 M KOH; d) Percentage of hydrogen peroxide yield and the electron transfer number (n) of BP-850 at different potentials in 0.1 M KOH; e) Cyclic voltammograms (CV) of BP-850 obtained in O<sub>2</sub> and Ar saturated in 0.1 M PBS; f) LSV curves of BP-850 at different rotation rates in 0.1 M PBS; g) K-L plot and the corresponding electron transfer numbers for BP-850 in 0.1 M PBS; h) Percentage of hydrogen peroxide yield and the electron transfer number (n) of BP-850 at different potentials in 0.1 M PBS; i) Cyclic voltammograms (CV) obtained in O<sub>2</sub> and Ar saturated in 0.1 M HClO<sub>4</sub>; j) LSV curves of BP-850 at different rotation rates in 0.1 M HClO<sub>4</sub>; k) K-L plot and the corresponding electron transfer numbers for BP-850 in 0.1 M HClO<sub>4</sub>; l) Percentage of hydrogen peroxide yield and the electron transfer number (n) of BP-850 at different potentials in 0.1 M HClO<sub>4</sub> electrolytes.

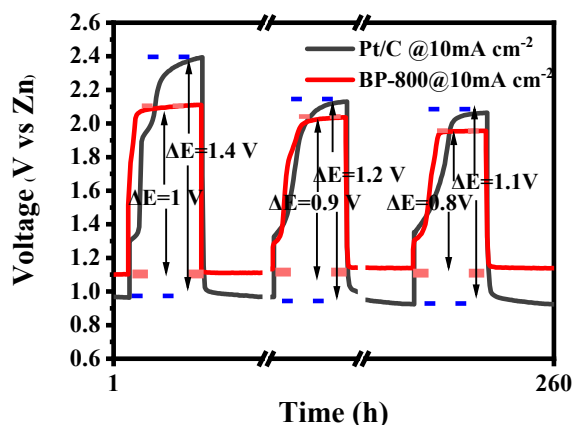

**Figure S18.** The charge and discharge efficiency at the beginning, middle, and end of the Zn-air battery for the BP-800 and Pt/C-IrO<sub>2</sub> catalyzed battery (the potential gap between the blue line is belonging to the Pt/C-IrO<sub>2</sub> catalyzed battery, and the potential gap between the red line is the battery catalyzed by the BP-800).

## Section 7. Supporting Tables

**Table S1.** Porosity Parameters of prepared polymers and corresponding catalysts.

| Sample  | $S_{\text{BET}}$ (m <sup>2</sup> /g) | Pore size (HK) nm | Pore size (BJH) nm | $V_{\text{Total}}$ (m <sup>3</sup> /g) |
|---------|--------------------------------------|-------------------|--------------------|----------------------------------------|
| BP-CMP  | 133.3                                | 2.23              | 2.34               | 0.13                                   |
| BP-700  | 568.9                                | 0.44              | 1.22               | 0.386                                  |
| BP-800  | 502.7                                | 0.49              | 1.22               | 0.408                                  |
| BP-850- | 379.5                                | 0.44              | 1.22               | 0.318                                  |

**Table S2.** The surface element contents of different species including carbon, oxygen, nitrogen, cobalt and iron in as-synthesized catalysts, calculated from the XPS spectra

| Sample        | C (at%) | O (at%) | Fe (at%) | N (at%) | Co (at%) | B (at%) |
|---------------|---------|---------|----------|---------|----------|---------|
| <b>BP-700</b> | 80.5    | 8.2     | 1.2      | 6.3     | 1.0      | 2.5     |
| <b>BP-800</b> | 85.6    | 6.2     | 1.1      | 4.6     | 0.7      | 1.6     |
| <b>BP-850</b> | 85.9    | 5.9     | 0.9      | 4.1     | 0.5      | 2.4     |

**Table S3.** The surface contents of different N species in BP-CMP catalysts, calculated from the XPS spectra

| Sample        | Pyridine-N in total<br>N (%) | Fe/Co-N in<br>total N (%) | Pyrrolic-N in<br>total N (%) | Graphitic-N in<br>total N (%) | Oxidized N in<br>total N(%) |
|---------------|------------------------------|---------------------------|------------------------------|-------------------------------|-----------------------------|
| <b>BP-700</b> | 13.4                         | 8.7                       | 22.6                         | 23.8                          | 31.3                        |
| <b>BP-800</b> | 16.7                         | 23.4                      | 5.8                          | 38.5                          | 15.3                        |
| <b>BP-850</b> | 15.3                         | 13.5                      | 14.2                         | 32.6                          | 24.4                        |

**Table S4.** Summary of various electrocatalysts for ORR in 0.1 M KOH.

| Catalyst                                                        | $E_{\text{Onset}}$ (V) | $E_{1/2}$ (V) | n           | Reference        |
|-----------------------------------------------------------------|------------------------|---------------|-------------|------------------|
| <b>BP-800</b>                                                   | <b>0.93</b>            | <b>0.80</b>   | <b>3.79</b> | <b>This work</b> |
| Single-holed Co/NC<br>hollow particles                          | 0.98                   | 0.87          | 3.99        | S1               |
| Fe-CZIF-800-10                                                  | 0.98                   | 0.83          | 3.87        | S2               |
| Co/CoNx/N-CNT/C                                                 | 0.90                   | 0.80          | 3.77        | S3               |
| C <sub>3</sub> N <sub>4</sub> @NH <sub>2</sub> -MIL-101-<br>700 | 0.99                   | 0.84          | 3.70        | S4               |
| Fe <sub>3</sub> C@N-CNT<br>assemblies                           | 0.97                   | 0.85          | 3.96        | S5               |
| (Fe, Co)@NGC                                                    | 0.91                   | 0.85          | 3.7         | S6               |
| CoFeNx/C                                                        | 1.01                   | 0.87          | 3.5         | S7               |
| PCN-FeCo/C                                                      | 1.00                   | 0.85          | 4.2         | S8               |
| FeCo-ISAs/CN                                                    | 1.00                   | 0.92          | 4.0         | S9               |

**Table S5.** Summary of various electrocatalysts for ORR in 0.1 M PBS.

| Catalyst                                                    | Eonset (V)  | E <sub>1/2</sub> (V) | n           | Reference        |
|-------------------------------------------------------------|-------------|----------------------|-------------|------------------|
| <b>BP-800</b>                                               | <b>0.85</b> | <b>0.66</b>          | <b>3.79</b> | <b>This work</b> |
| C <sub>3</sub> N <sub>4</sub> @NH <sub>2</sub> -MIL-101-700 | 0.92        | 0.67                 | 3.97        | S4               |
| Fe-N/C-800                                                  | 0.72        | 0.55                 | 3.97        | S10              |
| Fe-P-C                                                      | 0.84        | 0.52                 | 3.8         | S11              |
| FeIM/ZIF-8                                                  | 0.91        | 0.75                 | 3.7         | S12              |

**Table S6** Summary of various electrocatalysts for ORR in 0.1 M HClO<sub>4</sub>.

| Catalyst                                                    | Eonset (V)  | E <sub>1/2</sub> (V) | n           | Reference        |
|-------------------------------------------------------------|-------------|----------------------|-------------|------------------|
| <b>BP-800</b>                                               | <b>0.82</b> | <b>0.69</b>          | <b>3.79</b> | <b>This work</b> |
| C <sub>3</sub> N <sub>4</sub> @NH <sub>2</sub> -MIL-101-700 | 0.9         | 0.65                 | 3.95        | S4               |
| Cu-CTF/CP                                                   | 0.81        | 0.59                 | 3.7         | S13              |
| NPC-1000                                                    | 1.03        | 0.81                 | /           | S14              |
|                                                             |             | 8                    |             |                  |
| Co-N-C                                                      | /           | 0.73                 | /           | S15              |
|                                                             |             | 1                    |             |                  |



**Table S7.** The performance of electrically Zn-air batteries with various electrocatalysts.

| Catalyst                                 | Loading amount (mg/cm <sup>2</sup> ) | Electrolyte                          | Peak power density (mW cm <sup>-2</sup> ) | Open-circuit voltage | Stability                                  |
|------------------------------------------|--------------------------------------|--------------------------------------|-------------------------------------------|----------------------|--------------------------------------------|
| <b>BP-800 (This work)</b>                | <b>1</b>                             | <b>6.0M KOH &amp; 0.20M Zn(Ac)</b>   | <b>184.9</b>                              | <b>1.526</b>         | <b>75600 min Voltage-gap increased~0.2</b> |
| NPMC-1000 <sup>S16</sup>                 | 0.5                                  | 6.0M KOH                             | 55                                        | 1.48                 | 1800 min voltage gap increased~0.7         |
| Co(OH) <sub>2</sub> +N <sup>S17</sup>    | 1                                    | 6.0M KOH                             | 36                                        | -                    | 3000 min voltage gap increased ~0.2        |
| nanowires/stainless steel <sup>S18</sup> | 1.5                                  | 6.0M KOH                             | 40                                        | 0.98                 | 1000 min voltage Gap increased~0.1         |
| Fe/N-C <sup>S19</sup>                    | 2.2                                  | 6.0M KOH & 0.20M Zn(Ac) <sub>2</sub> | 40                                        | 1.4                  | 1000 min voltage gap increased ~0.16       |
| Fe-N-HPC <sup>S20</sup>                  | -                                    | 6.0M KOH                             | 164.8                                     | 1.44                 | 1800 min voltage gap increased ~0.16       |
| FeNi <sub>3</sub> @NC <sup>S21</sup>     | 1.0                                  | 6.0M KOH & 0.20M Zn(Ac) <sub>2</sub> | 139                                       | 1.37                 | 1800 min voltage gap increased ~0.16       |
| Fe-N-C <sup>S22</sup>                    | 0.5                                  | 6.0M KOH & 0.20M Zn(Ac) <sub>2</sub> | 156                                       | 1.45                 | 1000 min voltage gap increased ~0.14       |

|                                                            |     |                                           |    |      |                                              |
|------------------------------------------------------------|-----|-------------------------------------------|----|------|----------------------------------------------|
| Fe-enriched-<br>FeNi <sub>3</sub> /NC <sup>S23</sup>       | 1.0 | 6.0M KOH<br>&0.20M<br>Zn(Ac) <sub>2</sub> | 89 | 1.43 | 916 min<br>voltage gap<br>increased<br>~0.25 |
| FeS <sub>2</sub> -CoS <sub>2</sub><br>/NCFs <sup>S24</sup> | 0.5 | 6.0M KOH<br>&0.20M<br>Zn(Ac) <sub>2</sub> | 69 | 1.39 | 1800 min<br>voltage gap<br>increased<br>~0.3 |

---

## Section 8. Supporting Reference

- 1 B. Y. Guan, L. Yu and X. W. (David) Lou, *Adv. Sci.*, 2017, **4**, 1700247.
- 2 G. Li, J. Zhang, W. Li, K. Fan and C. Xu, *Nanoscale*, 2018, **10**, 9252–9260.
- 3 H. Zhong, Y. Luo, S. He, P. Tang, D. Li, N. Alonso-Vante and Y. Feng, *ACS Appl. Mater. Interfaces*, 2017, **9**, 2541–2549.
- 4 W. Gu, L. Hu, J. Li and E. Wang, *ACS Appl. Mater. Interfaces*, 2016, **8**, 35281–35288.
- 5 B. Y. Guan, L. Yu and X. W. (David) Lou, *Energy Environ. Sci.*, 2016, **9**, 3092–3096.
- 6 J. Xi, Y. Xia, Y. Xu, J. Xiao and S. Wang, *Chem. Commun.*, 2015, **51**, 10479–10482.
- 7 R. Jiang and D. Chu, *J. Power Sources*, 2014, **245**, 352–361.
- 8 Q. Lin, X. Bu, A. Kong, C. Mao, F. Bu and P. Feng, *Adv. Mater.*, 2015, **27**, 3431–3436.
- 9 D. Zhang, W. Chen, Z. Li, Y. Chen, L. Zheng, Y. Gong, Q. Li, R. Shen, Y. Han, W.C. Cheong, L. Gu and Y. Li, *Chem. Commun.*, 2018, **54**, 4274–4277.
- 10 L. Lin, Q. Zhu and A.-W. Xu, *J. Am. Chem. Soc.*, 2014, **136**, 11027–11033.
- 11 K. P. Singh, E. J. Bae and J.S. Yu, *J. Am. Chem. Soc.*, 2015, **137**, 3165–3168.
- 12 D. Zhao, J.L. Shui, C. Chen, X. Chen, B. M. Repragle, D. Wang and D.-J. Liu, *Chem. Sci.*, 2012, **3**, 3200–3205.
- 13 K. Iwase, T. Yoshioka, S. Nakanishi, K. Hashimoto and K. Kamiya, *Angew. Chemie Int.*

- Ed.*, 2015, **54**, 11068–11072.
- 14 L. Ye, G. Chai and Z. Wen, *Adv. Funct. Mater.*, 2017, **27**, 1606190.
  - 15 B. You, N. Jiang, M. Sheng, W. S. Drisdell, J. Yano and Y. Sun, *ACS Catal.*, 2015, **5**, 7068–7076.
  - 16 J. Zhang, Z. Zhao, Z. Xia and L. Dai, *Nat. Nanotechnol.* 2015, **10**, 444–452.
  - 17 B. Li, X. Ge, F. W. T. Goh, T. S. A. Hor, D. Geng, G. Du, Z. Liu, J. Zhang, X. Liu and Y. Zong, *Nanoscale*, 2015, **7**, 1830–1838.
  - 18 D. U. Lee, J.Y. Choi, K. Feng, H. W. Park and Z. Chen, *Adv. Energy Mater.*, 2014, **4**, 1301389.
  - 19 J. Wang, H. Wu, D. Gao, S. Miao, G. Wang and X. Bao, *Nano Energy*, 2015, **13**, 387–396.
  - 20 D. Wang, H. Xu, P. Yang, L. Xiao, L. Du, X. Lu, R. Li, J. Zhang, M. An, *J. Mater. Chem.A*, 2021, **9**, 9761-9770.
  - 21 D. Chen, J. Zhu, X. Mu, R. Cheng, W. Li, S. Liu, Z. Pu, C. Lin, S. Mu, *Appl. Catal. B*, 2020, 268,118729.
  - 22 R. Yuan, W. Bi, T. Zhou, N. Zhang, C.a. Zhong, W. Chu, W. Yan, Q. Xu, C. Wu, Y. Xie, *ACS Mater. Lett.*, 2019, **2**, 35-41.
  - 23 K. Chen, S. Kim, R. Rajendiran, K. Prabakar, G. Li, Z. Shi, C. Jeong, J. Kang, O.L. Li, *J Colloid Interface Sci*, 2021, **582**, 977-990.
  - 24 X. Shi, B. He, L. Zhao, Y. Gong, R. Wang, H. Wang, *J. Power Sources*, 2021, **482**, 228955.
